# Supplementary material
Source: PubMed Central journal article supplement (PMC6583520)
Supplement: jama-320-167-s002.pdf [file jama-320-167-s002.pdf]

## Supplementary Online Content

Hershman DL, Unger JM, Greenlee H, et al. Effect of acupuncture vs sham acupuncture or waitlist control on joint pain related to aromatase inhibitors among women with early-stage breast cancer: a randomized clinical trial. *JAMA*. doi:10.1001/jama.2018.8907

**eFigure 1.** Linear Mixed-Model Results Through 24 Weeks for the Additional Secondary Endpoints

**eFigure 2.** Percent With At Least a 2-Point Change on the Brief Pain Inventory Worst Pain Score

**eTable 1.** Number of Patients With a Given Type and Grade of Adverse Event

**eTable 2.** Differences in Proportions With >30% Improvement for Brief Pain Inventory Short Form Scores at Weeks 6 and 12 in Each Group

**eTable 3.** Observed and Fitted Group Mean Results and Differences in Proportions With >30% Improvement for M-SACRAH, WOMAC, FACT-ES, at Weeks 6 and 12 in Each Group

**eTable 4.** Linear Mixed-Model Results

**eTable 5.** Participating Study Sites

This supplementary material has been provided by the authors to give readers additional information about their work.

**eFigure 1.** Linear Mixed-Model Results Through 24 Weeks for the Additional Secondary Endpoints

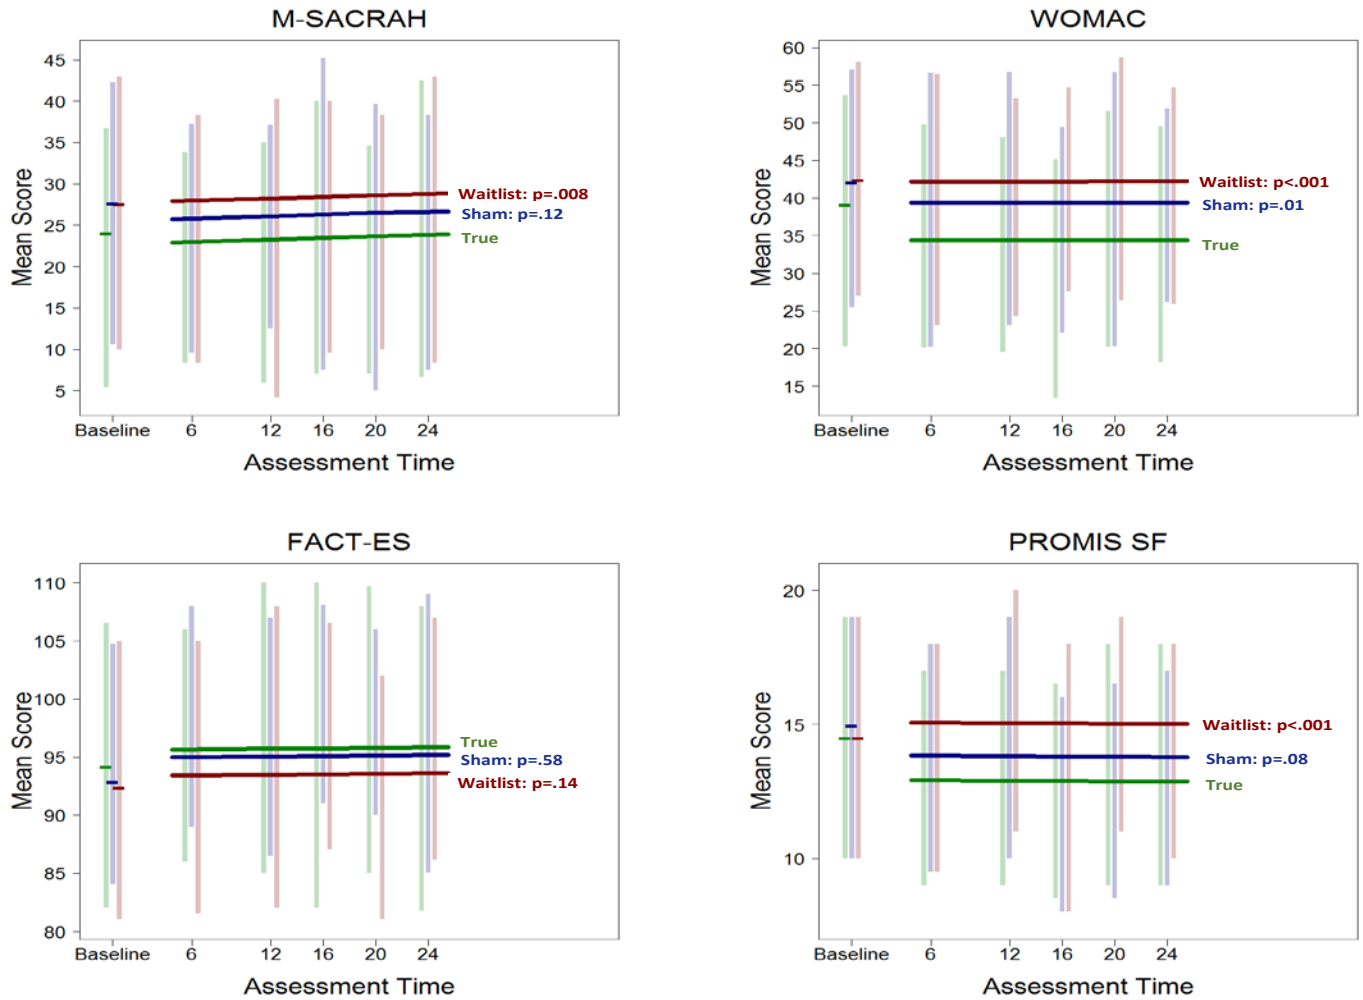

Linear mixed model results through 24 weeks for the additional secondary endpoints (M-SACRAH, WOMAC, FACT-ES, and PROMIS SF). The vertical boxes indicate the 50% interquartile range for observed true acupuncture scores (green), observed sham acupuncture scores (blue), and observed waitlist control scores (green). The observed mean for each arm at baseline is indicated by the horizontal line within each box. Boxes are offset by a small margin to avoid overlap and clearly show the 50% interquartile range for each arm. The fitted lines for each of the arms are also shown, with the p-value for the comparison of sham acupuncture and, separately, waitlist control, compared to the true acupuncture arm indicated.

**eFigure 2.** Percent With At Least a 2-Point Change on the Brief Pain Inventory Worst Pain Score

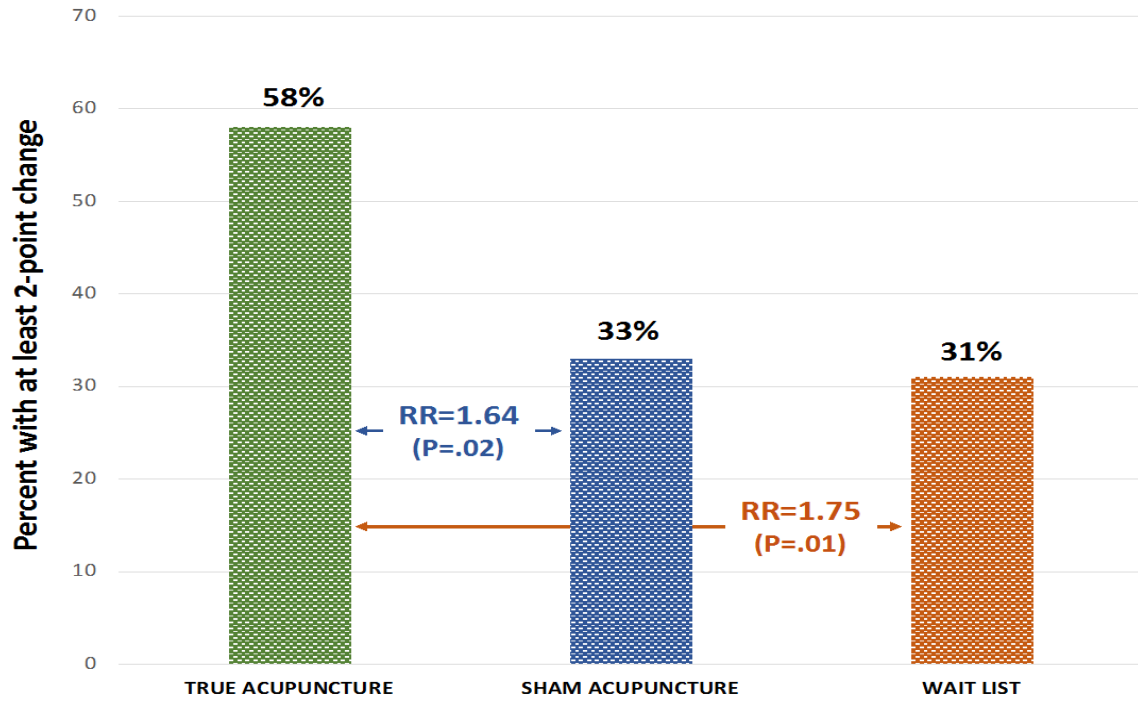

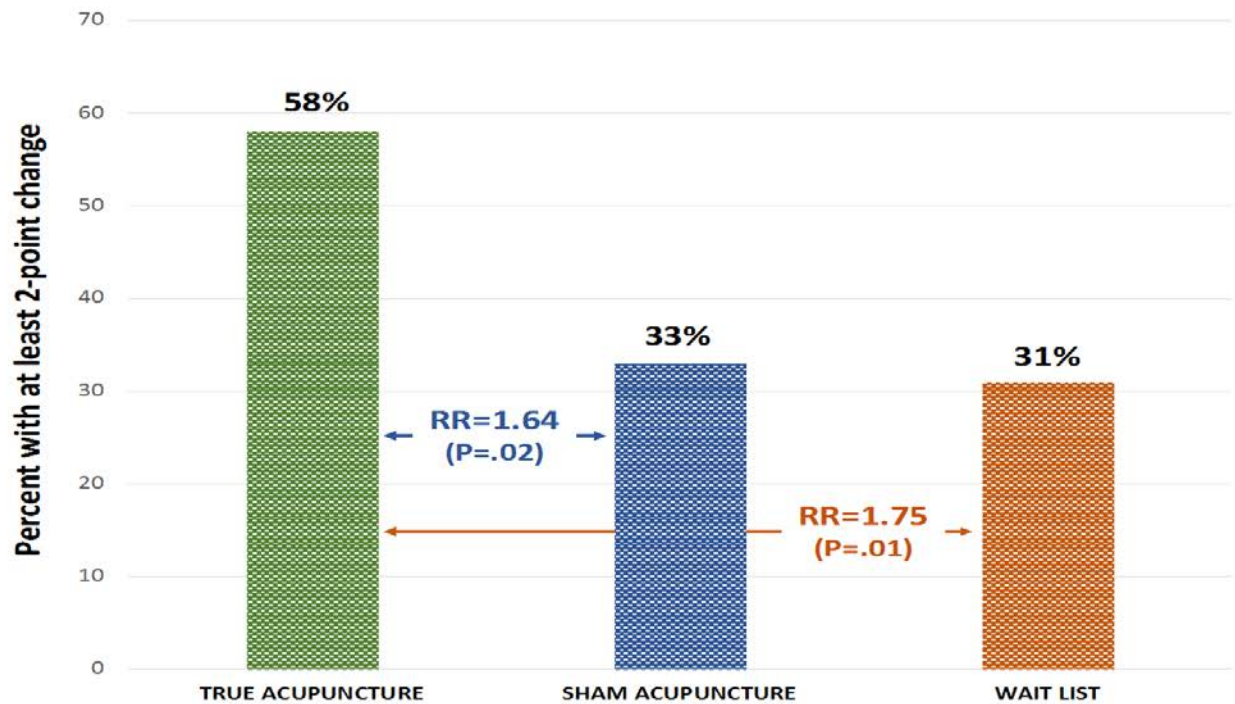

[Results for the Brief Pain Inventory – Short Form worst pain score at 6 weeks after randomization. The percent of patients achieving a 2 point improvement \(i.e. reduction\) in worst pain is shown by arm. The relative risk \(RR\) between true acupuncture and sham acupuncture \(1.64, 95% CI, 1.10-2.44, p=.02\) and between true acupuncture and waitlist \(RR=1.75, 95% CI, 1.13-2.69, p=.01\) are indicated.](#)

**eTable 1. Number of Patients With a Given Type and Grade of Adverse Event**

| ADVERSE EVENTS                          | True Acupuncture<br>(n=106)<br>Grade |    |    |   |   |   | Sham Acupuncture<br>(n=55)<br>Grade |    |    |   |   |   |
|-----------------------------------------|--------------------------------------|----|----|---|---|---|-------------------------------------|----|----|---|---|---|
|                                         | 0                                    | 1  | 2  | 3 | 4 | 5 | 0                                   | 1  | 2  | 3 | 4 | 5 |
| Arthralgia                              | 51                                   | 40 | 15 | 0 | 0 | 0 | 30                                  | 16 | 9  | 0 | 0 | 0 |
| Back pain                               | 104                                  | 2  | 0  | 0 | 0 | 0 | 55                                  | 0  | 0  | 0 | 0 | 0 |
| Bruising                                | 56                                   | 50 | 0  | 0 | 0 | 0 | 41                                  | 14 | 0  | 0 | 0 | 0 |
| Dizziness                               | 101                                  | 5  | 0  | 0 | 0 | 0 | 55                                  | 0  | 0  | 0 | 0 | 0 |
| Ear pain                                | 105                                  | 1  | 0  | 0 | 0 | 0 | 54                                  | 1  | 0  | 0 | 0 | 0 |
| Edema limbs                             | 103                                  | 3  | 0  | 0 | 0 | 0 | 55                                  | 0  | 0  | 0 | 0 | 0 |
| Hematoma                                | 105                                  | 1  | 0  | 0 | 0 | 0 | 55                                  | 0  | 0  | 0 | 0 | 0 |
| Hot flashes                             | 105                                  | 0  | 1  | 0 | 0 | 0 | 55                                  | 0  | 0  | 0 | 0 | 0 |
| Bleeding at injection site              | 103                                  | 3  | 0  | 0 | 0 | 0 | 53                                  | 2  | 0  | 0 | 0 | 0 |
| Intraoperative skin injury              | 105                                  | 1  | 0  | 0 | 0 | 0 | 55                                  | 0  | 0  | 0 | 0 | 0 |
| Myalgia                                 | 105                                  | 1  | 0  | 0 | 0 | 0 | 54                                  | 1  | 0  | 0 | 0 | 0 |
| Nausea                                  | 106                                  | 0  | 0  | 0 | 0 | 0 | 54                                  | 1  | 0  | 0 | 0 | 0 |
| Pain                                    | 101                                  | 5  | 0  | 0 | 0 | 0 | 55                                  | 0  | 0  | 0 | 0 | 0 |
| Pain in extremity                       | 105                                  | 1  | 0  | 0 | 0 | 0 | 55                                  | 0  | 0  | 0 | 0 | 0 |
| Peripheral sensory neuropathy           | 105                                  | 1  | 0  | 0 | 0 | 0 | 55                                  | 0  | 0  | 0 | 0 | 0 |
| Presyncope                              | 105                                  | 0  | 1  | 0 | 0 | 0 | 54                                  | 0  | 1  | 0 | 0 | 0 |
| ROM decreased                           | 101                                  | 5  | 0  | 0 | 0 | 0 | 53                                  | 1  | 1  | 0 | 0 | 0 |
| Skin/subq tissue ds-Other               | 105                                  | 1  | 0  | 0 | 0 | 0 | 55                                  | 0  | 0  | 0 | 0 | 0 |
| <b>MAX. GRADE ANY<br/>ADVERSE EVENT</b> | 29                                   | 61 | 16 | 0 | 0 | 0 | 23                                  | 22 | 10 | 0 | 0 | 0 |

**eTable 2. Differences in Proportions With >30% Improvement for Brief Pain Inventory Short Form Scores at Weeks 6 and 12 in Each Group**

| Analysis                 |          | N   | Proportion with >30% Improvement <sup>2</sup> |                                |         |                                     |         |
|--------------------------|----------|-----|-----------------------------------------------|--------------------------------|---------|-------------------------------------|---------|
|                          |          |     | >30% change                                   | Risk Difference (95% CI)       |         | Relative Risk (95% CI) <sup>2</sup> |         |
|                          |          |     |                                               | True – Sham<br>True – Waitlist | P-value | True/Sham<br>True/Waitlist          | P-value |
| <b>Worst Pain</b>        |          |     |                                               |                                |         |                                     |         |
| <b>Week 6</b>            | True     | 100 | 49.0%                                         |                                |         |                                     |         |
|                          | Sham     | 54  | 24.1%                                         | 24.9% (9.9%-40.0%)             | .001    | 1.95 (1.16-3.28)                    | .01     |
|                          | Waitlist | 51  | 23.5%                                         | 25.5% (10.3%-40.7%)            | .001    | 2.04 (1.19-3.48)                    | .009    |
| <b>Week 12</b>           | True     | 101 | 51.5%                                         |                                |         |                                     |         |
|                          | Sham     | 54  | 46.3%                                         | 5.2% (-11.3%-21.7%)            | .54     | 1.09 (0.77-1.54)                    | .62     |
|                          | Waitlist | 51  | 15.7%                                         | 35.8% (21.9%-49.8%)            | <.001   | 3.24 (1.66-6.34)                    | <.001   |
| <b>Average Pain</b>      |          |     |                                               |                                |         |                                     |         |
| <b>Week 6</b>            | True     | 100 | 43.0%                                         |                                |         |                                     |         |
|                          | Sham     | 54  | 25.9%                                         | 17.1% (1.9%-32.3%)             | .03     | 1.60 (0.97-2.63)                    | .07     |
|                          | Waitlist | 51  | 17.7%                                         | 25.4% (11.1%-39.6%)            | <.001   | 2.44 (1.28-4.62)                    | .006    |
| <b>Week 12</b>           | True     | 101 | 60.4%                                         |                                |         |                                     |         |
|                          | Sham     | 53  | 45.3%                                         | 15.1% (-1.3%-31.6%)            | .07     | 1.31 (0.94-1.83)                    | .11     |
|                          | Waitlist | 51  | 29.4%                                         | 31.0% (15.3%-46.7%)            | <.001   | 2.04 (1.30-3.21)                    | .002    |
| <b>Pain Interference</b> |          |     |                                               |                                |         |                                     |         |
| <b>Week 6</b>            | True     | 100 | 59.0%                                         |                                |         |                                     |         |
|                          | Sham     | 54  | 44.4%                                         | 14.6% (-1.8%-30.9%)            | .08     | 1.36 (0.98-1.89)                    | .06     |
|                          | Waitlist | 51  | 35.3%                                         | 23.7% (7.4%-40.0%)             | .004    | 1.68 (1.12-2.52)                    | .01     |
| <b>Week 12</b>           | True     | 101 | 68.3%                                         |                                |         |                                     |         |
|                          | Sham     | 54  | 64.8%                                         | 3.5% (-12.1%-19.1%)            | .66     | 1.06 (0.84-1.33)                    | .64     |
|                          | Waitlist | 51  | 37.3%                                         | 31.1% (15.0%-47.1%)            | <.001   | 1.85 (1.26-2.70)                    | .002    |
| <b>Pain Severity</b>     |          |     |                                               |                                |         |                                     |         |
| <b>Week 6</b>            | True     | 100 | 50.0%                                         |                                |         |                                     |         |
|                          | Sham     | 54  | 33.3%                                         | 16.7% (0.7%-32.6%)             | .04     | 1.52 (1.00-2.31)                    | .05     |
|                          | Waitlist | 51  | 33.3%                                         | 16.7% (0.4%-32.9%)             | .04     | 1.51 (0.98-2.34)                    | .06     |
| <b>Week 12</b>           | True     | 101 | 57.4%                                         |                                |         |                                     |         |
|                          | Sham     | 54  | 44.4%                                         | 13.0% (-3.4%-29.4%)            | .12     | 1.29 (0.92-1.81)                    | .15     |
|                          | Waitlist | 51  | 21.6%                                         | 35.9% (21.0%-50.7%)            | <.001   | 2.64 (1.53-4.55)                    | <.001   |
| <b>Worst Stiffness</b>   |          |     |                                               |                                |         |                                     |         |
| <b>Week 6</b>            | True     | 100 | 52.0%                                         |                                |         |                                     |         |
|                          | Sham     | 54  | 33.3%                                         | 18.7% (2.7%-34.6%)             | .02     | 1.56 (1.03-2.37)                    | .04     |
|                          | Waitlist | 51  | 29.4%                                         | 22.6% (6.7%-38.5%)             | .005    | 1.76 (1.11-2.78)                    | .02     |
| <b>Week 12</b>           | True     | 100 | 50.0%                                         |                                |         |                                     |         |
|                          | Sham     | 54  | 46.3%                                         | 3.7% (-12.8%-20.2%)            | .66     | 1.09 (0.78-1.53)                    | .62     |
|                          | Waitlist | 51  | 19.6%                                         | 30.4% (15.7%-45.1%)            | <.001   | 2.54 (1.42-4.54)                    | .002    |

1 – Among patients with follow-up scores

2 – Post-hoc analysis

**eTable 3. Observed and Fitted Group Mean Results and Differences in Proportions With  $\geq 30\%$  Improvement for M-SACRAH, WOMAC, FACT-ES, at Weeks 6 and 12 in Each Group**

|                     |          |     | Group Mean Differences |                      |                                |                      | Proportion with $\geq 30\%$ Improvement <sup>3</sup> |                                |           |                                     |             |
|---------------------|----------|-----|------------------------|----------------------|--------------------------------|----------------------|------------------------------------------------------|--------------------------------|-----------|-------------------------------------|-------------|
| Analysis            |          | N   | Baseline <sup>1</sup>  | Follow-Up            | Fitted Difference <sup>2</sup> | P-value <sup>2</sup> | $\geq 30\%$ change                                   | Risk Difference (95% CI)       |           | Relative Risk (95% CI) <sup>2</sup> |             |
|                     |          |     | Mean (95% CI)          | Mean (95% CI)        | True v Sham<br>True v Waitlist |                      |                                                      | True - Sham<br>True - Waitlist | P-value   | True - Sham<br>True - Waitlist      | P-value     |
| <b>M-SACRAH</b>     |          |     |                        |                      |                                |                      |                                                      |                                |           |                                     |             |
| <b>Week 6</b>       | True     | 101 | 33.21 (29.24-37.19)    | 20.66 (17.15-24.17)  |                                |                      | 60.4%                                                |                                |           |                                     |             |
|                     | Sham     | 53  | 34.49 (29.44-39.55)    | 27.62 (21.90-33.34)  | 6.23 (0.92-11.55)              | .02                  | 43.4%                                                | 17.0% (0.6%-33.4%)             | .04       | 1.38 (0.98-1.95)                    | .06         |
|                     | Waitlist | 51  | 30.75 (24.87-36.63)    | 27.53 (21.83-33.24)  | 9.40 (4.52-14.28)              | $\leq .001$          | 25.5%                                                | 34.9% (19.6%-50.2%)            | $< .0001$ | 2.34 (1.44-3.83)                    | $\leq .001$ |
| <b>Week 12</b>      | True     | 102 | 33.21 (29.24-37.19)    | 21.38 (17.72-25.04)  |                                |                      | 57.8%                                                |                                |           |                                     |             |
|                     | Sham     | 53  | 34.49 (29.44-39.55)    | 25.56 (20.46-30.67)  | 3.13 (-2.14-8.39)              | .25                  | 50.9%                                                | 6.9% (-9.6%-23.4%)             | .41       | 1.13 (0.83-1.54)                    | .43         |
|                     | Waitlist | 51  | 30.75 (24.87-36.63)    | 27.07 (21.57-32.57)  | 8.14 (2.94-13.33)              | .003                 | 35.3%                                                | 22.6% (6.3%-38.8%)             | .007      | 1.67 (1.13-2.46)                    | .01         |
| <b>WOMAC</b>        |          |     |                        |                      |                                |                      |                                                      |                                |           |                                     |             |
| <b>Week 6</b>       | True     | 101 | 52.13 (48.75-55.50)    | 32.35 (28.44-36.25)  |                                |                      | 60.4%                                                |                                |           |                                     |             |
|                     | Sham     | 54  | 51.38 (46.74-56.03)    | 40.65 (35.30-46.00)  | 9.27 (3.73-14.82)              | .001                 | 33.3%                                                | 27.6% (11.3%-42.8%)            | .0008     | 1.80 (1.19-2.71)                    | .005        |
|                     | Waitlist | 50  | 48.81 (44.30-53.32)    | 41.74 (36.28-47.20)  | 12.18 (6.76-17.59)             | $< .001$             | 24.0%                                                | 36.4% (21.2%-51.6%)            | $< .0001$ | 2.51 (1.50-4.21)                    | $\leq .001$ |
| <b>Week 12</b>      | True     | 102 | 51.13 (48.75-55.50)    | 30.55 (26.56-34.54)  |                                |                      | 60.8%                                                |                                |           |                                     |             |
|                     | Sham     | 54  | 51.38 (46.74-56.03)    | 35.59 (30.53-40.66)  | 5.76 (0.15-11.36)              | .05                  | 44.4%                                                | 16.3% (0.1%-32.6%)             | .05       | 1.37 (0.98-1.91)                    | .06         |
|                     | Waitlist | 51  | 48.81 (44.30-53.32)    | 41.20 (36.06-46.34)  | 13.19 (7.61-18.77)             | $< .001$             | 29.4%                                                | 31.4% (15.7%-47.1%)            | $< .0001$ | 2.12 (1.36-3.30)                    | $\leq .001$ |
| <b>FACT-ES</b>      |          |     |                        |                      |                                |                      |                                                      |                                |           |                                     |             |
| <b>Week 6</b>       | True     | 101 | 87.97 (84.90-91.05)    | 97.35 (94.13-100.57) |                                |                      | 35.6%                                                |                                |           |                                     |             |
|                     | Sham     | 54  | 88.93 (84.73-93.13)    | 95.01 (91.09-98.92)  | -3.38 (-6.92-0.16)             | .06                  | 18.9%                                                | 16.8% (2.7%-30.9%)             | .02       | 1.89 (1.03-3.48)                    | .04         |
|                     | Waitlist | 50  | 90.05 (86.10-94.00)    | 95.24 (91.27-99.21)  | -3.14 (-6.69-0.41)             | .08                  | 15.7%                                                | 20.0% (6.3%-33.6%)             | .004      | 2.24 (1.14-4.42)                    | .02         |
| <b>Week 12</b>      | True     | 102 | 87.97 (84.90-91.05)    | 98.08 (94.81-101.35) |                                |                      | 43.1%                                                |                                |           |                                     |             |
|                     | Sham     | 54  | 88.93 (84.73-93.13)    | 96.21 (92.20-100.23) | -3.13 (-6.95-0.70)             | .11                  | 27.8%                                                | 15.4% (0.0%-30.7%)             | .05       | 1.58 (0.98-2.55)                    | .06         |
|                     | Waitlist | 51  | 90.05 (86.10-94.00)    | 93.36 (89.04-97.67)  | -5.92 (-9.59 to -2.24)         | .002                 | 17.7%                                                | 25.5% (11.3%-39.7%)            | .0004     | 2.48 (1.32-4.66)                    | .005        |
| <b>PROMIS PI-SF</b> |          |     |                        |                      |                                |                      |                                                      |                                |           |                                     |             |
| <b>Week 6</b>       | True     | 101 | 17.56 (16.62-18.51)    | 13.20 (12.15-14.25)  |                                |                      | 57.4%                                                |                                |           |                                     |             |
|                     | Sham     | 54  | 16.48 (15.13-17.84)    | 14.13 (12.71-15.56)  | 1.68 (0.16-3.20)               | .03                  | 42.6%                                                | 14.8% (-1.5%-31.2%)            | .08       | 1.35 (0.96-1.91)                    | .09         |
|                     | Waitlist | 51  | 15.86 (14.52-17.19)    | 13.41 (12.07-14.75)  | 1.20 (-0.35-2.76)              | .13                  | 39.2%                                                | 18.2% (1.7%-34.7%)             | .03       | 1.45 (0.98-2.13)                    | .06         |
| <b>Week 12</b>      | True     | 102 | 17.56 (16.62-18.51)    | 12.41 (11.37-13.45)  |                                |                      | 62.8%                                                |                                |           |                                     |             |
|                     | Sham     | 54  | 16.48 (15.13-17.84)    | 13.14 (11.81-14.47)  | 1.51 (0.11-2.91)               | .04                  | 51.9%                                                | 10.9% (-5.4%-27.2%)            | .19       | 1.18 (0.88-1.60)                    | .26         |
|                     | Waitlist | 51  | 15.86 (14.52-17.19)    | 14.40 (12.82-15.99)  | 3.18 (1.61-4.76)               | $\leq .001$          | 31.4%                                                | 31.4% (15.6%-47.2%)            | .0001     | 1.92 (1.24-2.97)                    | .003        |

Abbreviations: FACT-ES=Functional Assessment of Cancer Therapy-Endocrine Subscale; M-SACRAH=Modified Score for the Assessment and Quantification of Chronic Rheumatoid Affections of the Hands; WOMAC= Western Ontario and McMaster Universities Osteoarthritis Index

1 – Among patients with follow-up scores

2 – From multivariable linear regression (for examinations of group mean differences by arm) or Poisson regression (for examination of relative risks), respectively, adjusting for the baseline score and the stratification factor.

3 – Post hoc analysis.

**eTable 4. Linear Mixed-Model Results**

|                   | Identification of Best Model <sup>1</sup>                                                                                     |                                |                                |                   |             | Best Model Fit <sup>2</sup>    |                                | Linear time coefficient <sup>3</sup> |
|-------------------|-------------------------------------------------------------------------------------------------------------------------------|--------------------------------|--------------------------------|-------------------|-------------|--------------------------------|--------------------------------|--------------------------------------|
|                   | Model type<br>(log-likelihood from dummy variable model; p-value)<br>(log-likelihood from ordinal categorical model; p-value) |                                |                                |                   |             | Indicator variable model       |                                |                                      |
|                   | Quadratic interaction                                                                                                         | Linear interaction             | Quadratic time                 | Linear time       | Best model  | True vs. Waitlist              | True vs. Sham                  |                                      |
| Worst Pain        | 4169.9; p=.40<br>4174.4; p=.99                                                                                                | 4174.5; p=.78<br>4175.0; p=1.0 | 4174.9; p=.75<br>4174.9; p=.75 | 4175.0<br>4175.0  | Linear time | 1.23 (0.66 to 1.80)<br>p<.001  | 0.59 (0.34 to 1.14)<br>P=.04   | -0.01 (-.03 to 0.01)<br>P=.55        |
| Average Pain      | 3587.3; p=.85<br>3588.1; p=.89                                                                                                | 3588.5; p=.67<br>3589.0; p=.67 | 3589.3; p=1.0<br>3589.7; p=.75 | 3589.3<br>3589.8  | Linear time | 0.81 (0.33 to 1.29)<br>p=.001  | 0.56 (0.09 to 1.03)<br>p=.02   | -0.01 (-0.02 to 0.004)<br>p=.16      |
| Pain Interference | 3586.9; p=.44<br>3591.5; p=.99                                                                                                | 3589.9; p=.41<br>3591.6; p=.90 | 3591.7; p=1.0<br>3591.8; p=1.0 | 3591.7<br>3591.8  | Linear time | 0.76 (0.26 to 1.26)<br>p=.003  | 0.33 (-0.15 to 0.82)<br>P=.18  | -0.01 (-0.03 to 0.006)<br>P=.23      |
| Pain Severity     | 3511.2; p=.70<br>3513.1; p=.95                                                                                                | 3513.8; p=.82<br>3514.0; p=.90 | 3514.0; p=.65<br>3514.0; p=.65 | 3514.2<br>3514.2  | Linear time | 0.87 (0.40 to 1.33)<br>P<.001  | 0.41 (-0.04 to 0.87)<br>P=.08  | -0.005 (-0.02 to 0.01)<br>P=.48      |
| Worst Stiffness   | 4156.8; p=.35<br>4160.2; p=.34                                                                                                | 4160.3; p=.35<br>4161.8; p=.70 | 4162.4; p=1.0<br>4162.4; p=.75 | 4162.4;<br>4162.5 | Linear time | 1.27 (0.69 to 1.85)<br>P<.001  | 0.66 (0.09 to 1.22)<br>P=.02   | -0.004 (-0.02 to 0.02)<br>P=.71      |
| M-SACRAH          | 8018.0; p=.58<br>8021.6; p=1.0                                                                                                | 8020.0; p=.41<br>8021.6; p=1.0 | 8021.7; p=.75<br>8021.8; p=1.0 | 8021.8<br>8021.8  | Linear time | 4.99 (1.33 to 8.66)<br>P=.008  | 2.86 (-0.70 to 6.42)<br>P=.12  | 0.05 (-0.06 to 0.16)<br>P=.35        |
| WOMAC             | 8397.6; p=.84<br>8398.7; p=.84                                                                                                | 8399.7; p=1.0<br>8400.0; p=1.0 | 8399.3; p=.53<br>8399.7; p=.58 | 8399.7<br>8400.0  | Linear time | 7.79 (3.89 to 11.7)<br>P<.001  | 4.95 (1.15 to 8.76)<br>P=.01   | 0.002 (-0.13 to 0.14)<br>P=.98       |
| FACT-ES           | 7326.8; p=.52<br>7327.5; p=.61                                                                                                | 7330.4; p=.74<br>7330.5; p=.74 | 7329.6; p=.24<br>7329.7; p=.24 | 7331.0<br>7331.1  | Linear time | -2.02 (-4.69 to 0.64)<br>P=.14 | -0.74 (-3.32 to 1.85)<br>P=.58 | 0.007 (-0.07 to 0.09)<br>P=.87       |
| PROMIS PI-SF      | 5691.8; p=.44<br>5694.4; p=.43                                                                                                | 5693.0; p=.17<br>5695.5; p=.55 | 5696.5; p=.75<br>5696.6; p=.75 | 5696.6<br>5696.7  | Linear time | 2.14 (1.10 to 3.17)<br>P<.001  | 0.90 (-0.10 to 1.90)<br>P=.08  | -0.003 (-0.04 to 0.03)<br>P=.89      |

1 – Identification of best model was based on testing differences in log likelihood between nested models. The following nested model comparisons were made: quadratic interaction model (with 12 degrees of freedom (df)) compared to simple linear model (with 7 df); linear interaction model (with 9 df) compared to simple linear model (with 7 df); and quadratic time model (with 8 df) compared to linear time model (with 7 df). If the test of the difference in model log likelihoods, distributed chi-square with degrees of freedom equal to the difference in degrees of freedom from each model, was <.05, the higher order model (quadratic interaction, linear interaction, quadratic time) was chosen as the best fit. Otherwise, the linear time model was chosen as the best fit model.

2 - Two models were examined, one using separate indicator variables to represent intervention assignment, and one using an ordinal categorical variable to represent intervention assignment.

3 – For each outcome, the linear time coefficient was the same for both the indicator variable model and the ordinal categorical variable model.



**eTable 5: Participating Study Sites**

|                                                                       |
|-----------------------------------------------------------------------|
| Spectrum Health Medical Group, Grand Rapids, MI                       |
| Kaiser Permanente Medical Center, Walnut Creek, CA                    |
| Columbia University Minority Underserved-NCORP, New York, NY          |
| NCORP of the Carolinas (Greenville Health System), Greenville, SC     |
| St. Luke's Mountain States Tumor Institute (PCRC NCORP), Boise, ID    |
| Fred Hutchinson Cancer Research Center, Seattle, WA                   |
| Lahey Hospital & Medical Center – NCORP, Burlington, MA               |
| Good Samaritan Hospital/Oregon Health Science University, Portland OR |
| Pacific Cancer Research Consortium NCORP, Seattle, Washington         |
| University of Southern California. Los Angeles, CA                    |
| University of Utah, Salt Lake City, UT                                |
